# Supplementary material for: Multiple waves of freshwater colonization of the three-spined stickleback in the Japanese Archipelago
Source: Research Square preprint supplement (doi:10.21203/rs.3.rs-59443/v3), 2020-10-30

**A**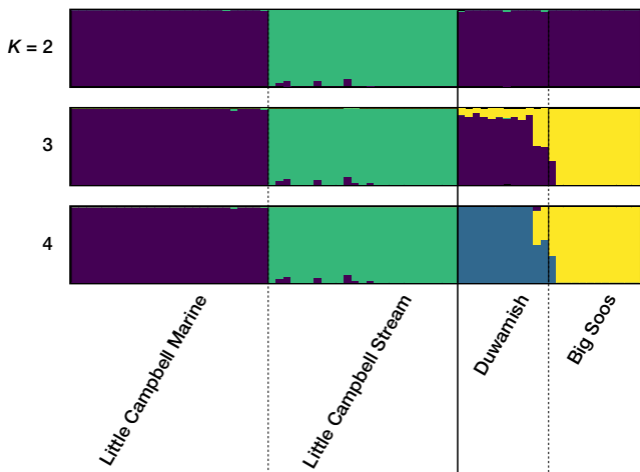**B**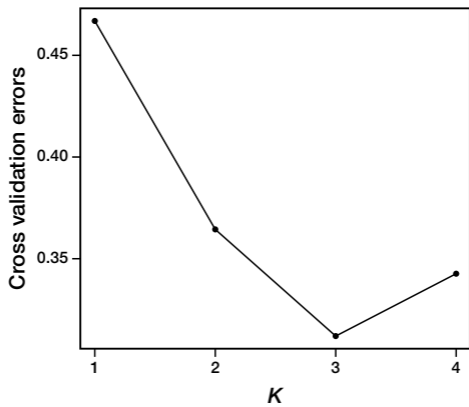

Supplement: Supplementary file [file 1fea6f6fdd6154746c6517d8.pdf]
